# Supplementary material for: Precise design and in situ synthesis of hollow Co9S8@CoNi-LDH heterostructure for high-performance supercapacitors
Source: Royal Society of Chemistry journal article supplement (doi:10.1039/d3dt01991h), 2023-01-01
Supplement: d3dt01991h1.pdf [file d3dt01991h1.pdf]

## Supporting Information

### Precise design and in-situ synthesis of hollow $\text{Co}_9\text{S}_8@\text{CoNi-LDH}$ heterostructure for high performance supercapacitors

Jiachao Zhou,<sup>a</sup> Yingchao Wang,<sup>a</sup> Linli Chen,<sup>a</sup> Wenna Zhao<sup>\*,b</sup> and Lei Han<sup>\*,a</sup>

<sup>a</sup> State Key Laboratory Base of Novel Functional Materials and Preparation Science, School of Materials Science and Chemical Engineering, Ningbo University, Ningbo, Zhejiang 315211, China.

<sup>b</sup> School of Biological and Chemical Engineering, Ningbotech University, Ningbo, Zhejiang 315100, China

\*E-mail: [hanlei@nbu.edu.cn](mailto:hanlei@nbu.edu.cn); [wz Zhao@nit.zju.edu.cn](mailto:wz Zhao@nit.zju.edu.cn)

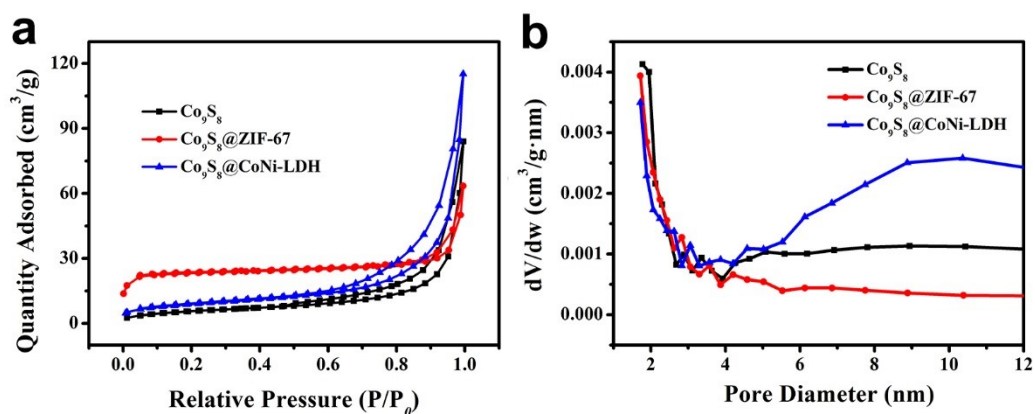

**Fig. S1** (a)  $\text{N}_2$  adsorption-desorption isotherms and (b) pore-size distribution of  $\text{Co}_9\text{S}_8$ ,  $\text{Co}_9\text{S}_8@\text{ZIF-67}$  and  $\text{Co}_9\text{S}_8@\text{CoNi-LDH}$ .

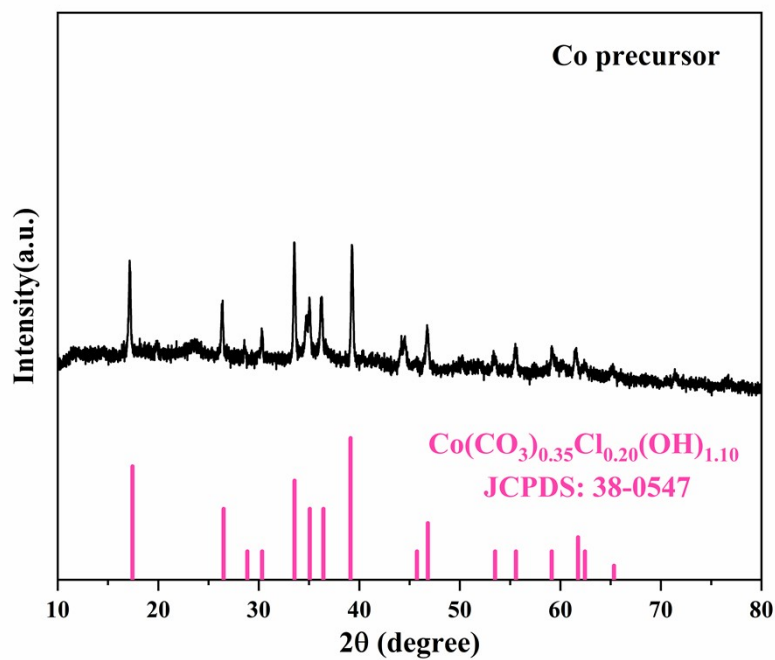

Fig. S2 XRD pattern of Co precursor.

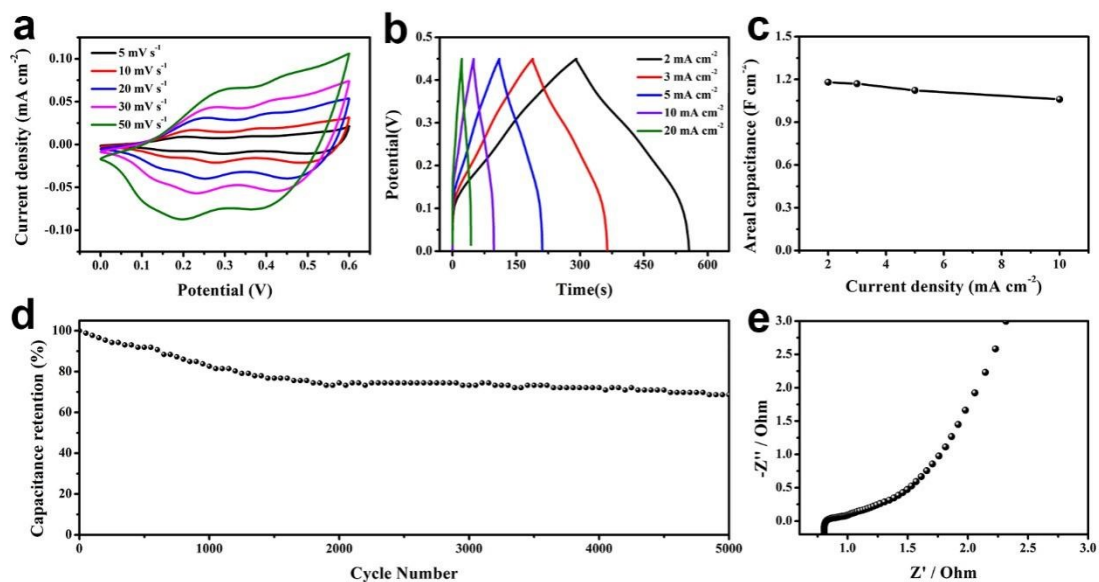

Fig. S3 The electrochemical properties of CoCH/NF. (a) CV curves at scan rates of 5-50  $\text{mV s}^{-1}$ ; (b) GCD curves at current density of 2-20  $\text{mA cm}^{-2}$ ; (c) The specific capacitance at current densities of 1-10  $\text{mA cm}^{-2}$ ; (d) The cycling capacity after 5000 cycles, (e) Nyquist plots of ESI.

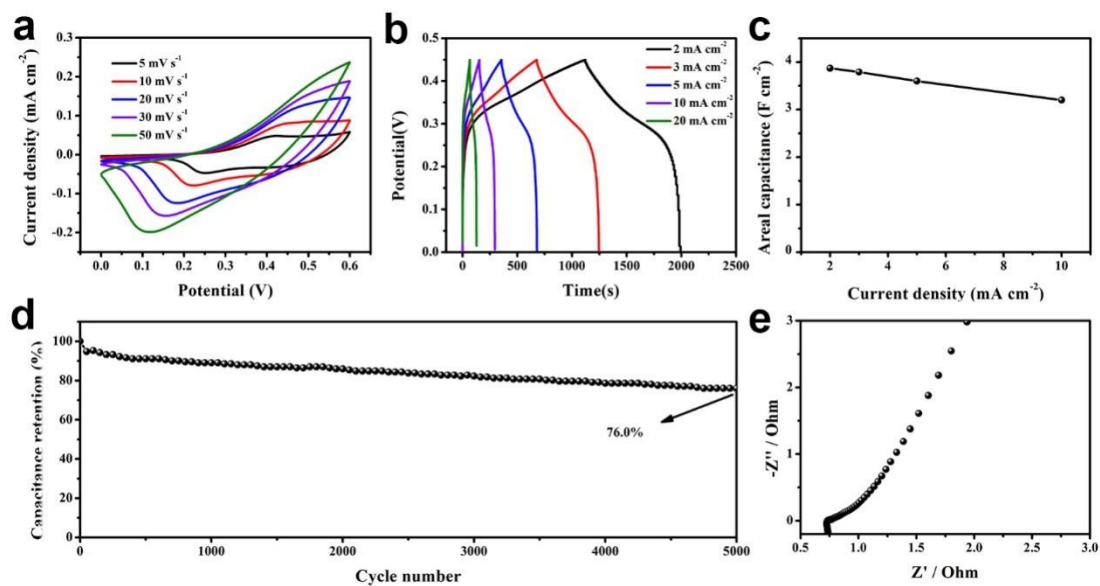

**Fig. S4** The electrochemical properties of  $\text{Co}_9\text{S}_8/\text{NF}$ . (a) CV curves at scan rates of 5-50  $\text{mV s}^{-1}$ ; (b) GCD curves at current density of 2-20  $\text{mA cm}^{-2}$ ; (c) The specific capacitance at current densities of 1-10  $\text{mA cm}^{-2}$ ; (d) The cycling capacity after 5000 cycles, (e) Nyquist plots of ESI.

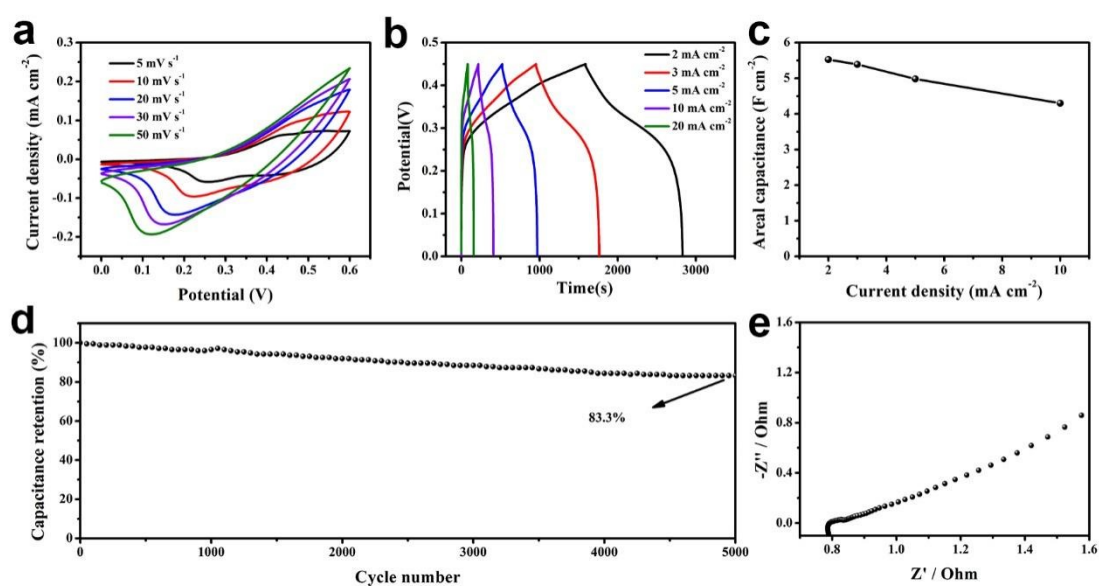

**Fig. S5** The electrochemical properties of  $\text{Co}_9\text{S}_8@\text{ZIF-67}/\text{NF}$ . (a) CV curves at scan rates of 5-50  $\text{mV s}^{-1}$ ; (b) GCD curves at current density of 2-20  $\text{mA cm}^{-2}$ ; (c) The specific capacitance at current densities of 1-10  $\text{mA cm}^{-2}$ ; (d) The cycling capacity after 5000 cycles, (e) Nyquist plots of ESI.

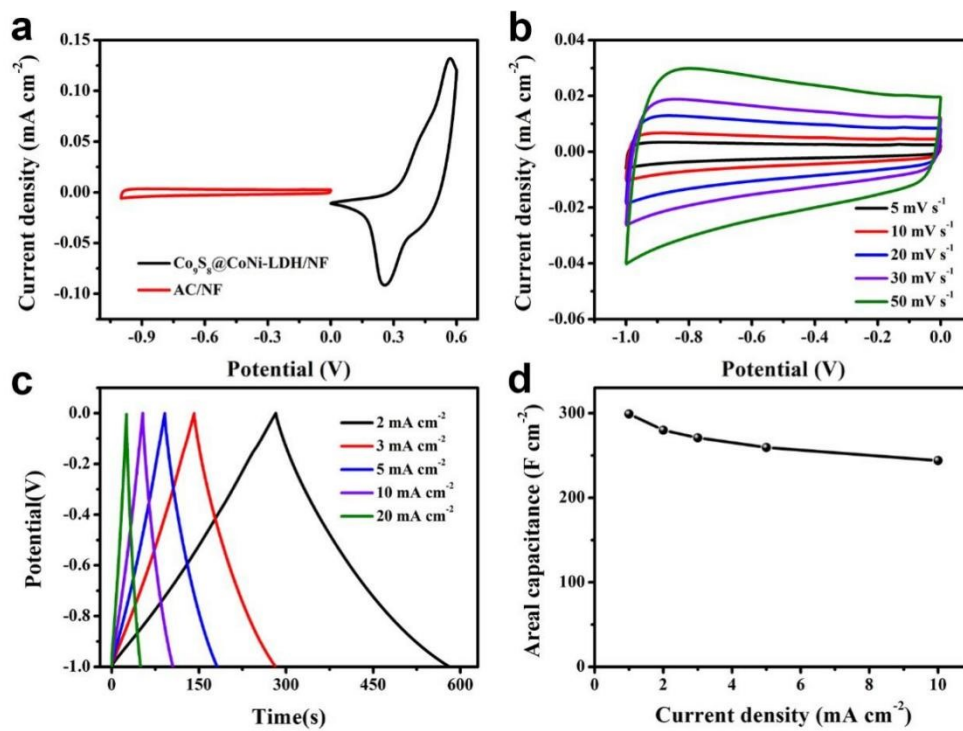

**Fig. S6** (a) The CV curves of AC and  $\text{Co}_9\text{S}_8@\text{CoNi-LDH/NF}$ ; (b) The CV curves of the AC at scan rates of  $5\text{-}50 \text{ mV s}^{-1}$ ; (c) The GCD curves of AC at current density of  $2\text{-}20 \text{ mA cm}^{-2}$ ; (d) The specific capacity of AC at current densities of  $1\text{-}10 \text{ mA cm}^{-2}$ .

**Table S1** The capacitance comparison of other CoNi-LDH based electrode materials

| Electrode material                           | Specific capacitance                                                                               | Cycle performance         | Ref.      |
|----------------------------------------------|----------------------------------------------------------------------------------------------------|---------------------------|-----------|
| CNTs/Ni Co LDH                               | 1628 F g <sup>-1</sup> at 1 A g <sup>-1</sup>                                                      | 78.073% after 5000 cycles | S1        |
| H-NiCo LDH@ACC                               | 1377mC/cm <sup>2</sup> at 1mA/cm <sup>2</sup>                                                      | 70% after 10000 cycles    | S2        |
| CoNi-LDH                                     | 986.3 F g <sup>-1</sup> at 1 A g <sup>-1</sup>                                                     | 92.3% after 10000 cycles  | S3        |
| CNMnL-m                                      | 1644 F g <sup>-1</sup> at 1 A g <sup>-1</sup>                                                      | 94.2% after 5000 cycles   | S4        |
| Ni <sub>x</sub> Co <sub>1-x</sub> LDH/AC     | 947 F g <sup>-1</sup> at 1 A g <sup>-1</sup>                                                       | 80% after 5000 cycles     | S5        |
| CoNi LDH@Co <sub>3</sub> O <sub>4</sub> @CC  | 1021.7 F g <sup>-1</sup> at 10 A g <sup>-1</sup>                                                   | Not mentioned             | S6        |
| Ni/Co-LDH                                    | 1652 F·g <sup>-1</sup> at 1 A·g <sup>-1</sup>                                                      | 99% after 2000 cycles     | S7        |
| NiCoAl-LDH/NF                                | 5691.25 mF cm <sup>-2</sup> at 1 mA cm <sup>-2</sup>                                               | 73.5% after 3000 cycles   | S8        |
| 4M-P@NiCo LDH                                | 7 F cm <sup>-2</sup> at 50 mA cm <sup>-2</sup>                                                     | 72.5% after 5000 cycles   | S9        |
| (Ni,Co)Se <sub>2</sub> /NiCo-LDH             | 1224 F g <sup>-1</sup> at 2A·g <sup>-1</sup>                                                       | 89.5% after 3000 cycles   | S10       |
| Co <sub>3</sub> O <sub>4</sub> @Ni-Co LDH/NF | 1069 C g <sup>-1</sup> at 1 A·g <sup>-1</sup>                                                      | 67.9% after 5000 cycles   | S11       |
| Co <sub>9</sub> S <sub>8</sub> @CoNi-LDH     | 9.7 F cm <sup>-2</sup> (2411 F g <sup>-1</sup> , 1085 C g <sup>-1</sup> ) at 2 mA cm <sup>-2</sup> | 92% after 5000 cycles     | This work |

#### References

- S1. M. Huang, Y. Wang, J. Chen, D. He, J. He and Y. Wang, Biomimetic design of Ni Co LDH composites linked by carbon nanotubes with plant conduction tissues characteristic for hybrid supercapacitors, *Electrochim. Acta*, 2021, **381**, 138289.
- S2. X. Xuan, M. Qian, L. Han, L. Wan, Y. Li, T. Lu, L. Pan, Y. Niu and S. Gong, In-situ growth of hollow NiCo layered double hydroxide on carbon substrate for flexible supercapacitor, *Electrochim. Acta*, 2019, **321**, 134710.
- S3. B. Huang, W. Wang, T. Pu, J. Li, J. Zhu, C. Zhao, L. Xie and L. Chen, Two-dimensional porous (Co, Ni)-based monometallic hydroxides and bimetallic layered double hydroxides thin sheets with honeycomb-like nanostructure as positive electrode for high-performance hybrid supercapacitors, *J. Colloid Interface Sci.*, 2018, **532**, 630-640.
- S4. W. Quan, Y. Xu, Y. Wang, S. Meng, D. Jiang and M. Chen, Hierarchically structured

Co<sub>3</sub>O<sub>4</sub>@glucose-modified LDH architectures for high-performance supercapacitors, *Appl. Surf. Sci.*, 2019, **488**, 639-647.

S5. T. Chen, L. Luo, X. Wu, Y. Zhou, W. Yan, M. Fan and W. Zhao, Three dimensional hierarchical porous nickel cobalt layered double hydroxides (LDHs) and nitrogen doped activated biocarbon composites for high-performance asymmetric supercapacitor, *J. Alloys Compd.*, 2021, **859**, 158318.

S6. D. Wang, L. Tian, D. Li, Y. Xu and Q. Wei, Rational design of Co–Ni layered double hydroxides electrodeposited on Co<sub>3</sub>O<sub>4</sub> nanoneedles derived from 2D metal-organic frameworks for high-performance asymmetric supercapacitors, *J. Electroanal. Chem.*, 2020, **873**, 114377.

S7. Z. Xiao, Y. Mei, S. Yuan, H. Mei, B. Xu, Y. Bao, L. Fan, W. Kang, F. Dai, R. Wang, L. Wang, S. Hu, D. Sun and H. C. Zhou, Controlled Hydrolysis of Metal-Organic Frameworks: Hierarchical Ni/Co-Layered Double Hydroxide Microspheres for High-Performance Supercapacitors, *ACS Nano*, 2019, **13**, 7024-7030.

S8. P. Li, Y. Jiao, S. Yao, L. Wang and G. Chen, Dual role of nickel foam in NiCoAl-LDH ensuring high-performance for asymmetric supercapacitors, *New J. Chem.*, 2019, **43**, 3139-3145.

S9. G. Wang, Z. Jin and W. Zhang, A phosphatized NiCo LDH 1D dendritic electrode for high energy asymmetric supercapacitors, *Dalton Trans.*, 2019, **48**, 14853-14863.

S10. X. Li, H. Wu, C. Guan, A. M. Elshahawy, Y. Dong, S. J. Pennycook and J. Wang, (Ni,Co)Se<sub>2</sub>/NiCo-LDH Core/Shell Structural Electrode with the Cactus-Like (Ni,Co)Se<sub>2</sub> Core for Asymmetric Supercapacitors, *Small*, 2019, **15**, 1803895.

S11. Y. Zhang, Y. Wang, J. Zhu, X. Zhang and W. Cai, Regulating the core/shell electric structure of Co<sub>3</sub>O<sub>4</sub>@Ni-Co layered double hydroxide on Ni foam through electrodeposition for a quasi-solid-state supercapacitor, *Nanotechnology*, 2021, **32**, 345702.
